# Neostigmine Administration after Spontaneous Recovery to a Train-of-Four Ratio of 0.9 to 1.0

## *A Randomized Controlled Trial of the Effect on Neuromuscular and Clinical Recovery*

Glenn S. Murphy, M.D., Joseph W. Szokol, M.D., Michael J. Avram, Ph.D., Steven B. Greenberg, M.D., Torin D. Shear, M.D., Mark A. Deshur, M.D., Jessica Benson, B.S., Rebecca L. Newmark, B.A., Colleen E. Maher, B.S.

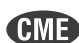

This article has been selected for the ANESTHESIOLOGY CME Program. Learning objectives and disclosure and ordering information can be found in the CME section at the front of this issue.

### ABSTRACT

**Background:** When a muscle relaxant is administered to facilitate intubation, the benefits of anticholinesterase reversal must be balanced with potential risks. The aim of this double-blinded, randomized noninferiority trial was to evaluate the effect of neostigmine administration on neuromuscular function when given to patients after spontaneous recovery to a train-of-four ratio of 0.9 or greater.

**Methods:** A total of 120 patients presenting for surgery requiring intubation were given a small dose of rocuronium. At the conclusion of surgery, 90 patients achieving a train-of-four ratio of 0.9 or greater were randomized to receive either neostigmine 40 µg/kg or saline (control). Train-of-four ratios were measured from the time of reversal until postanesthesia care unit admission. Patients were monitored for postextubation adverse respiratory events and assessed for muscle strength.

**Results:** Ninety patients achieved a train-of-four ratio of 0.9 or greater at the time of reversal. Mean train-of-four ratios in the control and neostigmine groups before reversal (1.02 *vs.* 1.03), 5 min postreversal (1.05 *vs.* 1.07), and at postanesthesia care unit admission (1.06 *vs.* 1.08) did not differ. The mean difference and corresponding 95% CI of the latter were -0.018 and -0.046 to 0.010. The incidences of postoperative hypoxemic events and episodes of airway obstruction were similar for the groups. The number of patients with postoperative signs and symptoms of muscle weakness did not differ between groups (except for double vision: 13 in the control group and 2 in the neostigmine group; *P* = 0.001).

**Conclusions:** Administration of neostigmine at neuromuscular recovery was not associated with clinical evidence of anticholinesterase-induced muscle weakness.

**Visual Abstract:** An online visual overview is available for this article at <http://links.lww.com/ALN/B633>. (**ANESTHESIOLOGY 2018; 128:27-37**)

THE use of reversal agents to antagonize neuromuscular blockade varies widely with country of practice, type of anesthetic practice, and individual clinician preference.<sup>1-5</sup> Most anesthesiologists routinely reverse neuromuscular blocking agents (NMBAs) if obvious muscle weakness is present at the time of tracheal extubation. However, if a single small dose (one to two times ED<sub>95</sub>; the dose required to reduce single twitch height by 95%) of a nondepolarizing NMBA has been given and more than 2 h have elapsed since the time of administration, the decision process is more complex; the benefits of reversal with an anticholinesterase agent (or sugammadex) must be balanced with the potential risks. The primary advantage of routine use of neostigmine at the conclusion of surgery is a reduction in the risk of postoperative residual neuromuscular blockade (defined as a train-of-four [TOF] ratio less than 0.9). A high incidence of residual blockade (37 to 82%) has been reported when reversal agents are not administered.<sup>4,6-8</sup> Furthermore, failure to reverse the

#### What We Already Know about This Topic

- There is a high incidence of residual neuromuscular blockade when reversal drugs are not administered, and this is associated with postoperative adverse outcomes
- When there is substantial spontaneous recovery from neuromuscular blockade, it is unclear whether an anticholinesterase improves or impairs outcome

#### What This Article Tells Us That Is New

- In this randomized trial of patients achieving a train-of-four ratio of 0.9 or greater, half received either neostigmine 40 µg/kg or saline (control)
- There was no difference between groups in train-of-four ratios minutes after reversal or on recovery room admission and no difference in the incidence of postoperative muscle weakness, hypoxemia, or airway obstruction
- Anticholinesterases should be routinely administered after neuromuscular blockade, without fear of causing muscle weakness, unless full neuromuscular recovery has been documented with quantitative monitoring

This article is featured in "This Month in Anesthesiology," page 1A. Corresponding article on page 1. This article has an audio podcast.

Copyright © 2017, the American Society of Anesthesiologists, Inc. Wolters Kluwer Health, Inc. All Rights Reserved. Anesthesiology 2018; 128:27-37

effects of NMBAs has been associated with an increased risk of postoperative pneumonia, coma, and mortality.<sup>9,10</sup> On the basis of these data, several editorials and reviews have recommended that, unless full neuromuscular recovery has been documented with quantitative monitoring, antagonism of NMBAs should be a routine practice.<sup>5,11–13</sup>

In contrast, other authors have cautioned against the routine administration of anticholinesterases to surgical patients.<sup>14–16</sup> Neostigmine has neuromuscular blocking properties when given in the absence of neuromuscular blockade,<sup>14,15,17</sup> which can induce a paradoxical reduction in the TOF ratio<sup>15,17,18</sup> and impair upper airway and breathing function.<sup>19–21</sup> Furthermore, database studies have also suggested that anticholinesterase reversal is associated with an increased risk of adverse postoperative respiratory events.<sup>16,22,23</sup>

Administration of an anticholinesterase to a patient in whom neuromuscular function has almost recovered could either increase the block and produce negative respiratory consequences<sup>14–16,19–24</sup> or have no adverse effect on neuromuscular recovery and result in no clinically important muscle weakness.<sup>25–28</sup> The aim of this randomized, double-blinded, placebo-controlled noninferiority study was to assess the effect of neostigmine (40 µg/kg) on neuromuscular function when given to patients after spontaneous recovery to a TOF ratio of 0.9 or greater. The dose of 40 µg/kg was selected because this represents an approximately average dose given by anesthesiologists,<sup>3</sup> yet is higher than the low-dose regimen (10 to 30 µg/kg) used to study reversal of shallow neuromuscular blockade by Fuchs-Buder *et al.*<sup>27</sup> TOF ratios were measured from the time of neostigmine administration until postanesthesia care unit (PACU) admission. In addition, patients were assessed for any adverse respiratory events (hypoxemia or airway obstruction) and signs and symptoms of muscle weakness during the early anesthesia recovery period. We tested the hypothesis that TOF ratios at the time of PACU admission would not be less in patients randomly assigned to receive neostigmine at TOFs of 0.9 to 1.0 compared with patients randomly assigned to receive saline (placebo) at that time (primary endpoint). We also tested the secondary hypotheses that the incidence of postextubation adverse respiratory events and signs or symptoms of muscle weakness would not be increased in patients randomly assigned to receive neostigmine.

## Materials and Methods

### Study Population and Perioperative Management

The NorthShore University HealthSystem Institutional Review Board (Evanston, Illinois) reviewed and approved this clinical investigation, which was registered at clinicaltrials.gov (NCT02433808, principal investigator Glenn Murphy,

registration date April 2015, patient enrollment April 2015 to December 2016, full protocol can be obtained by request). The study was conducted at a single tertiary medical center (NorthShore University HealthSystem), and written informed consent was obtained from all of the subjects.

A total of 120 patients presenting for elective surgical procedures with an expected duration of at least 90 min were enrolled in this randomized, double-blinded, placebo-controlled noninferiority trial. Procedures were selected that required neuromuscular blockade for tracheal intubation but none thereafter. Exclusion criteria included American Society of Anesthesiologists physical status IV and V patients, ages less than 18 or more than 80 yr, need for succinylcholine for rapid sequence intubation, presence of renal insufficiency (defined as a serum creatinine concentration greater than 2.0 mg/dl) or renal failure (serum creatinine greater than three times the baseline), significant liver disease (cirrhosis or hepatic failure), presence of neuromuscular disease, or patients assessed as potentially unable to complete an examination of muscle strength in the PACU due to preoperative disease states or the nature of the surgical procedure. In addition, patients not achieving a TOF ratio of 0.9 or greater at the end of surgery were excluded from further participation in the investigation. The research assistants evaluated eligibility, obtained informed consent, and enrolled the participants.

Patients were assigned to one of two groups using a computer-generated randomization table (simple randomization without restrictions, pharmacy administered). The allocation sequence was generated by one of the study investigators. The randomization assignments were provided by the study investigator to the operating room pharmacy, which prepared the study drugs. Anesthesia care teams were provided with one of two syringes: a 10-ml syringe containing 40 µg/kg neostigmine with 8 µg/kg glycopyrrolate or a 10-ml syringe containing an equal volume of saline. Both syringes contained clear fluid, appeared identical, and were labeled *study drug*. At the end of the surgical procedure, patients in the neostigmine group were administered neostigmine and glycopyrrolate, and those in the control group were given saline. Throughout the perioperative period, care providers, patients, and research team members were blinded to group assignment. The administration of all other anesthetic agents was standardized to reflect the usual clinical practices.

Patients were premedicated with 2 mg of midazolam before transport to the operating room. Standard monitoring was applied to all of the patients, which included electrocardiography, pulse oximetry, noninvasive blood pressure measurements, capnography, central temperature assessment (nasopharyngeal or esophageal), and Bispectral Index monitoring (BIS system, Covidien/Medtronic, USA). Anesthesia was induced with propofol 1 to 2 mg/kg, lidocaine 50 mg, and fentanyl 100 µg. Clinicians were instructed to administer a small dose of rocuronium (one to less than two times ED<sub>95</sub>) that would facilitate tracheal intubation and to give no additional NMBA for the remainder of the procedure.

Submitted for publication April 9, 2017. Accepted for publication July 19, 2017. From the Department of Anesthesiology, NorthShore University HealthSystem, University of Chicago Pritzker School of Medicine, Chicago, Illinois (G.S.M., J.W.S., S.B.G., T.D.S., M.A.D., J.B., R.L.N., C.E.M.); and Department of Anesthesiology, Northwestern University Feinberg School of Medicine, Chicago, Illinois (M.J.A.).

Anesthesia was maintained with sevoflurane 1.0 to 3.0%, with the concentration adjusted to maintain Bispectral Index values of 40 to 60 and systemic blood pressure within 20% of baseline measures. Hypotension was treated with phenylephrine 80 µg, ephedrine 5 to 10 mg, or a fluid bolus, as clinically indicated. The lungs were ventilated with 50% oxygen and air and ventilation adjusted to achieve an end-tidal carbon dioxide of 30 to 34 mmHg. Additional doses of fentanyl, up to 2 µg · kg<sup>-1</sup> · h<sup>-1</sup>, were administered at the discretion of the anesthesia care team. In procedures associated with moderate-to-severe pain, intravenous hydromorphone 1 to 2 mg was given at the conclusion of the surgical procedure. Antiemetic prophylaxis included intravenous dexamethasone 8 mg at induction of anesthesia and ondansetron 4 mg within 30 min of tracheal extubation. A forced-air warming system was used to maintain core temperatures greater than 35°C and upper extremity temperatures greater than 32°C.

Neuromuscular monitoring was conducted in accordance with good clinical research practice guidelines in pharmacodynamic studies of NMBAs.<sup>29</sup> After cleansing the skin, two surface electrodes, separated by 3 cm, were placed over the ulnar nerve. The acceleration transducer of the TOF-Watch SX (Bluestar Enterprises, USA) was attached to the distal phalanx of the thumb *via* a hand adapter. The hand adapter (TOF-Watch Hand Adapter, Bluestar Enterprises) applied a constant preload and also allowed a reproducible baseline thumb position. A 5-s, 50-Hz tetanic stimulation was applied to reduce the time required to achieve baseline signal stabilization. The TOF-Watch SX was then calibrated (CAL 2 mode) and, after signal stability was achieved, baseline TOF values were recorded. Rocuronium was then administered as described above. The TOF-Watch SX was positioned so that members of the anesthesia care team were blinded to TOF ratio data. Intraoperative use of a peripheral nerve stimulator to assess depth of neuromuscular blockade subjectively was permitted by the protocol.

At the conclusion of the surgical procedure, a member of the research team measured TOF ratios with the TOF-Watch SX. Subjects not achieving a TOF value of 0.9 or greater were excluded from further study participation. Clinicians were instructed to administer these patients neostigmine (50 µg/kg) and to perform tracheal extubation when standard clinical criteria were met (see below). Neuromuscular and clinical recovery data were collected in the remaining subjects who had spontaneously recovered to a TOF ratio of 0.9 or greater. Patients randomly assigned to the neostigmine group were administered 40 µg/kg neostigmine and glycopyrrolate, and those assigned to the control group were given saline. Tracheal extubation was performed when the following clinical criteria were achieved: following commands, 5-s head lift, adequate spontaneous ventilation, and absence of fade with subjective TOF assessment. Patients were then transferred to the PACU; use of nasal cannula oxygen during transport was at the discretion of the anesthesia care team. On arrival to the PACU, all of the patients received 2 l/min oxygen *via* a nasal cannula. Management of patient care in the PACU was per standard protocols.

### Data Collection

TOF ratio measurements were manually recorded by a research assistant on a data collection sheet immediately before administration of neostigmine or saline and then every 12 s thereafter until tracheal extubation was performed. The research team attempted to collect at least 5 min of TOF data (the peak clinical effect of neostigmine occurring approximately 5 min after administration).<sup>15</sup> For analysis, TOF ratios at each 1-min interval were determined by averaging the TOF measurement at that time with the TOF ratio measured immediately before and after that value. The time from administration of the contents of the study syringes until tracheal extubation was recorded. After removal of the endotracheal tube, a portable pulse oximeter (Rad-5, Masimo, USA) was attached to the patient's finger and peripheral oxygen saturation measured by pulse oximetry (SpO<sub>2</sub>) monitored continuously by a research assistant from the time of extubation until admission to the PACU. SpO<sub>2</sub> measurements were manually recorded every 30 s and lowest SpO<sub>2</sub> determined. In addition, patients were carefully monitored by the research team for any evidence of upper airway impairment during transport to the PACU. Episodes of airway obstruction were recorded, as was the need for interventions to treat upper airway events.

On arrival to the PACU, TOF ratios were again assessed. Two consecutive TOF measurements were obtained and the average of the two values recorded. If measurements differed by more than 10%, additional TOF measurements were obtained (up to four TOF values), and the closest two ratios were averaged. The time from neostigmine administration until TOF measurements in the PACU was determined. Pulse oximetry was monitored continuously in the PACU, and SpO<sub>2</sub> data were recorded by PACU nursing staff on a data collection sheet. Episodes of moderate (SpO<sub>2</sub> of 93 to 90%) and severe (SpO<sub>2</sub> of less than 90%) hypoxemia were documented, as was the lowest SpO<sub>2</sub> observed during the PACU admission. The need for additional oxygen therapy or manual stimulation to maintain SpO<sub>2</sub> values greater than 93% was also noted. In addition, PACU nursing staff assessed patients during the admission for episodes of upper airway obstruction and subsequent interventions used to treat these episodes. The presence of nausea and emesis was noted.

Fifteen minutes after PACU admission, patients were assessed for 11 signs and 16 symptoms of muscle weakness. The research assistant performed testing in a standardized manner. Patients were initially requested to perform 11 tests of muscle strength (objective signs of muscle weakness). Patients either passed (negative response) or failed (positive response) each of the tests. After each of the tests was performed, patients were asked whether the test was difficult to complete or uncomfortable to perform (subjective symptom of muscle weakness). The presence of a symptom was recorded as a positive response and the absence of a



symptom was recorded as a negative response. Patients were then questioned about five additional symptoms of residual muscle paresis unrelated to the 11 tests of muscle strength. After the assessment was completed, patients were asked to quantify the degree of overall weakness experienced at the time of the examination on an 11-point verbal rating scale (0 = no muscle weakness, 10 = most severe muscle weakness experienced).

Patient demographic data and type of surgical procedure were recorded from electronic preoperative medical forms. The electronic anesthesia record was used to determine the duration of the surgical procedure; volume of crystalloid; blood loss; total intraoperative doses of rocuronium, fentanyl, and hydromorphone; and temperature at the end of the procedure. Baseline TOF ratios (before administration of NMBA) often exceed 1.00 when quantified with the TOF-Watch SX. For example, if the baseline TOF was 1.15, a TOF of 0.90 measured at the end of surgery represented a corrected or normalized TOF ratio of 0.78. Therefore, TOF values recorded immediately before administration of the contents of the study syringes were also corrected for baseline measures.

### Statistical Analysis

The primary outcome measure was the TOF ratio at the time of PACU admission. Sample sizes were calculated based on the hypothesis that TOF ratios at the time of PACU admission would not be less in patients randomly assigned to receive neostigmine at TOFs of 0.9 to 1.0 compared with patients randomly assigned to receive saline (placebo) at that time (PASS 2005, Number Cruncher Statistical Systems, USA). Group sample sizes of 41 and 41 achieved 80% power to detect noninferiority using a one-sided, two-sample *t* test. The margin of equivalence was  $-0.05$ . The true difference between the means was assumed to be 0.00. The significance level ( $\alpha$ ) of the test was 0.05. The data were drawn from populations with SDs of 0.09 and 0.09. We studied 60 patients per group to account for the patients who would potentially not achieve recovery of neuromuscular function at the time of reversal (*i.e.*, they would have a TOF ratio of 0.9 or less).

Data for the primary outcome variable, TOF ratio at PACU admission are reported as the mean  $\pm$  SD for both the control group and the neostigmine group. These primary outcome data were compared between groups using a one-sided, two-sample *t* test (NCSS 2004, Number Cruncher Statistical Systems). The mean difference and its 95% CI were calculated. The criterion for rejection of the null hypothesis was  $P < 0.05$ .

Secondary variables that were characterized by nominal data (*e.g.*, the presence of signs and symptoms of muscle weakness) are summarized as the number of patients in each category and the percentage of all patients in that group that they represent. These variables were compared between the randomized groups using Pearson chi-square

test or, when at least one of the cells of the contingency table had an expected number less than five, the Fisher exact probability test (NCSS). The Miettinen and Nurminen score was used to calculate 99% CIs for differences in percentages where they are reported. Variables that were characterized by ordinal data and nonnormally distributed continuous data (*e.g.*, time from neostigmine administration to PACU TOF measurement or general weakness) are summarized as median and interquartile range. These variables were compared between the randomized groups using the Mann–Whitney U test (StatsDirect version 3.0.198, StatsDirect, United Kingdom). Median differences and their 99% CIs were calculated where they are reported. Variables that were characterized by normally distributed continuous data (*e.g.*, rocuronium doses or TOF ratios before reversal) are summarized as mean and SD. These variables were compared between the randomized groups using the unpaired *t* test (NCSS). Mean differences and their 99% CIs were determined. Because of the large number of comparisons that were made, the criterion for rejection of the null hypothesis was a two-tailed  $P < 0.01$  for all between-group comparisons. Continuous data measured repeatedly over time (*e.g.*, TOF ratios and arterial oxygen saturations in the first 5 min after placebo or neostigmine administration) were compared between and within groups over time using a two-factor ANOVA with repeated measures on one factor (time) with  $P < 0.01$  the criterion for rejection of the null hypothesis; *post hoc* analysis using the Holm–Sidak method for pairwise multiple comparisons was planned to be used where indicated (SigmaPlot 11.0, Systat Software, Inc., USA).

### Results

A total of 120 patients were enrolled in the clinical trial. Five patients were excluded from additional analysis when the anesthesia care team used succinylcholine instead of rocuronium for tracheal intubation. One patient was excluded when the pharmacy was unable to prepare the study syringes. At the conclusion of the surgery, 24 patients (21.1%) did not achieve a TOF ratio threshold of 0.9 and were excluded from additional data analysis. Quantitative neuromuscular and clinical recovery data were collected on the remaining 90 patients (47 in the neostigmine group and 43 in the control group; fig. 1).

Patient characteristics are presented in table 1. The study groups did not differ in sex, weight, height, American Society of Anesthesiologists physical status, types of surgical procedures, or preexisting medical conditions. No differences were observed between the two groups in anesthesia time, administration of crystalloids, blood loss, doses of intraoperative opioids (fentanyl and hydromorphone), or core temperature at the end of the procedure (table 2). The doses of rocuronium used at induction of anesthesia in the control group ( $26 \pm 7$  mg) and the neostigmine group ( $25 \pm 8$  mg;  $P = 0.639$ ) were also similar (table 2).

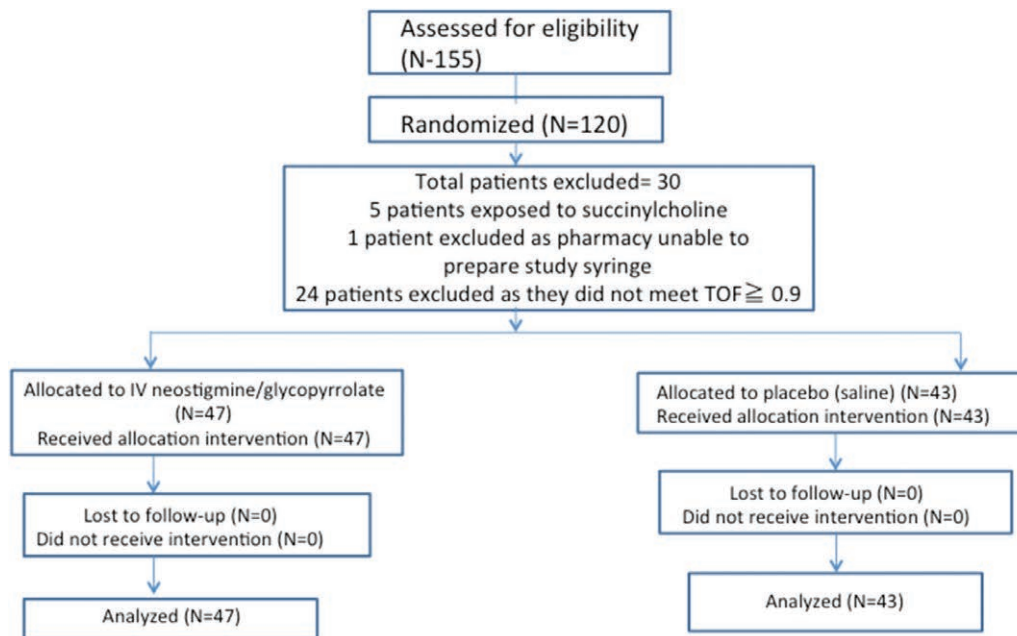

Fig. 1. Study flowchart. TOF = train-of-four.

Table 1. Patient Characteristics

|                                    | Control Group | Neostigmine Group |
|------------------------------------|---------------|-------------------|
| Sample size                        | 43            | 47                |
| Sex, men                           | 15 (34.9%)    | 15 (31.9%)        |
| Age, yr                            | 50.4 ± 16.3   | 55.6 ± 14.6       |
| Weight, kg                         | 76.9 ± 18.3   | 74.5 ± 15.4       |
| Height, cm                         | 168.5 ± 10.9  | 168.5 ± 10.0      |
| ASA physical status                | 2 (2–2)       | 2 (2–2)           |
| Smoking history                    | 0 (0%)        | 5 (10.6%)         |
| Drinking history                   | 1 (2.3%)      | 0 (0%)            |
| Hypertension                       | 10 (23.3%)    | 11 (23.4%)        |
| History of coronary artery disease | 2 (4.7%)      | 3 (6.4%)          |
| Congestive heart failure           | 0 (0%)        | 1 (2.1%)          |
| Arrhythmia                         | 1 (2.3%)      | 1 (2.1%)          |
| Asthma                             | 6 (14.0%)     | 5 (10.6%)         |
| Sleep apnea                        | 4 (9.3%)      | 3 (6.4%)          |
| Diabetes mellitus                  | 4 (9.3%)      | 3 (6.4%)          |
| Thyroid disease                    | 6 (14.0%)     | 11 (23.4%)        |
| Procedure                          |               |                   |
| Orthopedic                         | 5 (11.6%)     | 6 (12.8%)         |
| Ears, nose, and throat             | 15 (34.9%)    | 13 (27.7%)        |
| Gynecologic                        | 14 (32.6%)    | 18 (38.3%)        |
| Endocrine                          | 9 (20.9%)     | 10 (21.3%)        |

Data are mean ± SD, median (interquartile range), or number of patients (%).

ASA = American Society of Anesthesiologists; COPD = chronic obstructive pulmonary disease; drinking history = alcohol consumption more than 2 drinks per day.

TOF ratios in the control and neostigmine groups at PACU admission, the primary outcome, did not differ between groups ( $1.059 \pm 0.070$  and  $1.076 \pm 0.060$ , respectively; difference [95% CI],  $-0.018$  [ $-0.046$  to  $0.010$ ]).

Additional quantitative neuromuscular monitoring data are presented in table 2 and figure 2. Mean TOF ratios measured before reversal ( $1.02$  vs.  $1.03$ ), as well as normalized values ( $0.95$  vs.  $0.97$ ) at that time, did not differ between the control and study groups, respectively. Similarly, TOF measurements between 1 min postreversal and 5 min postreversal were not different between groups. At PACU admission, TOF ratios had increased in both groups from prereversal values (from  $1.02$  to  $1.06$  in the control group and from  $1.03$  to  $1.08$  in the neostigmine group;  $P < 0.001$  for both increases). Reductions in TOF values were not observed in any subject in either study group.

Data relating to postoperative oxygenation and adverse airway events after tracheal extubation are presented in table 2 and figure 3. During the time between tracheal extubation and admission to the PACU, the lowest observed peripheral oxygenation measures ( $\text{SpO}_2$ ) did not differ between groups (94% control group vs. 95% neostigmine group). Only one episode of airway obstruction (neostigmine group) was noted during this time. During the PACU admission, the percentages of patients with moderate hypoxemic events (39.5% vs. 19.2%), severe hypoxemic events (18.6% vs. 8.5%), and requiring additional oxygen therapy (34.9% vs. 14.9%) were larger in the control group than in the neostigmine group, although this difference was not statistically significant given our conservative criterion for rejection of the null hypothesis ( $P = 0.033$ ,  $0.159$ , and  $0.028$ , respectively). Only three episodes of airway obstruction were observed in the PACU (two in the control group and one in the neostigmine group).

Signs and symptoms of muscle weakness in the PACU are presented in table 3. No differences were observed between

**Table 2.** Perioperative Data

|                                                         | Control Group     | Neostigmine Group | Difference (99% CI)    | P Value |
|---------------------------------------------------------|-------------------|-------------------|------------------------|---------|
| <b>Intraoperative data</b>                              |                   |                   |                        |         |
| Anesthesia duration, min                                | 155 (119–201)     | 171 (136–212)     | –13 (–44 to 16)        | 0.209   |
| Blood loss, ml                                          | 25 (15–75)        | 50 (10–100)       | –5 (–50 to 15)         | 0.367   |
| Crystalloid volume, ml                                  | 1393 ± 491        | 1302 ± 546        | 91 (–198 to 380)       | 0.411   |
| Temperature at end of procedure, °C                     | 36.1 ± 0.6        | 36.1 ± 0.6        | 0.0 (–0.4 to 0.3)      | 0.935   |
| Total rocuronium dose, mg                               | 25.6 ± 6.7        | 24.9 ± 8.0        | 0.7 (–3.4 to 4.8)      | 0.639   |
| Total fentanyl dose, µg                                 | 150 (100–200)     | 150 (100–250)     | 0 (–50 to 0)           | 0.208   |
| Total dilauidid dose, mg                                | 0 (0–0.2)         | 0 (0–0.2)         | 0 (0–0)                | 0.908   |
| Train-of-four ratio before reversal                     | 1.02 ± 0.08       | 1.03 ± 0.07       | –0.01 (–0.05 to 0.03)  | 0.506   |
| Corrected train-of-four ratio before reversal           | 0.95 ± 0.06       | 0.97 ± 0.06       | –0.02 (–0.06 to 0.01)  | 0.108   |
| <b>Transport data</b>                                   |                   |                   |                        |         |
| Lowest SpO <sub>2</sub> , %                             | 94.1 ± 3.6*       | 94.6 ± 3.2‡       | –0.5 (–2.4 to 1.4)     | 0.508   |
| Airway obstruction                                      | 0 (0%)            | 1 (2.1%)          | –2.1% (–16.0 to 11.5%) | > 0.999 |
| Treatment of obstruction                                | 0 (0%)            | 0 (0%)            | 0% (–12.4 to 13.4%)    | –       |
| SpO <sub>2</sub> on PACU arrival, %                     | 95.9 ± 3.0        | 96.6 ± 2.7        | –0.75 (–2.3 to 0.9)    | 0.236   |
| Oxygen during transport                                 | 30 (69.8%)        | 32 (68.1%)        | 1.7% (–23.5 to 26.3%)  | 0.863   |
| <b>PACU data</b>                                        |                   |                   |                        |         |
| Train-of-four ratio in PACU                             | 1.06 ± 0.07†      | 1.08 ± 0.06‡      | –0.02 (–0.06 to 0.02)  | 0.216   |
| Time neostigmine to PACU train-of-four measurement, min | 14.0 (11.0–18.5)† | 14 (11–17)‡       | 1 (–2 to 4)            | 0.571   |
| Patients with episodes SpO <sub>2</sub> 90–93%          | 17 (39.5%)        | 9 (19.2%)         | 20.4% (–4.4 to 43.6%)  | 0.033   |
| No. of episodes SpO <sub>2</sub> 90–93%                 | 0 (0–1)           | 0 (0–0)           | 0 (0–0)                | 0.046   |
| Patients with episodes SpO <sub>2</sub> < 90%           | 8 (18.6%)         | 4 (8.5%)          | 10.1% (–9.5 to 30.8%)  | 0.159   |
| No. of episodes SpO <sub>2</sub> < 90%                  | 0 (0–0)           | 0 (0–0)           | 0 (0–0)                | 0.149   |
| Needed additional oxygen therapy                        | 15 (34.9%)        | 7 (14.9%)         | 20.0% (–3.6 to 42.6%)  | 0.028   |
| Needed stimulation                                      | 12 (27.9%)        | 6 (12.8%)         | 15.1% (–7.1 to 37.3%)  | 0.073   |
| Lowest SpO <sub>2</sub> observed, %                     | 94 (90–97)        | 95 (94–96)        | –1 (–3 to 1)           | 0.261   |
| Airway obstruction                                      | 2 (4.7%)          | 1 (2.1%)          | 2.5% (–11.9 to 18.8%)  | 0.604   |
| Treatment of airway obstruction                         | 1 (2.3%)          | 1 (2.1%)          | 0.2% (–13.9 to 15.4%)  | > 0.999 |
| Nausea events                                           | 10 (23.3%)        | 9 (19.2%)         | 4.1% (–18.5 to 27.1%)  | 0.633   |
| Emetic episodes                                         | 3 (7.0%)          | 4 (8.5%)          | –1.5% (–19.1 to 16.6%) | > 0.999 |

Data are mean ± SD, median (interquartile range), or number of patients (%). Data reported as mean ± SD were compared using the unpaired *t* test, data reported as median (interquartile range) were compared using the Mann–Whitney U test, and data reported as number of patients (%) were compared using Pearson chi-square test, or when at least one of the cells of the contingency table had an expected *n* < 5, Fisher exact probability test. No *P* value met the criterion for rejection of the null hypothesis (*P* < 0.01). *n* = 43 in the control group and *n* = 47 in the neostigmine group, except where indicated. Need stimulation included patients requiring manual stimulation to increase oxygenation.

\**N* = 42. †*N* = 40. ‡*N* = 44.

PACU = postanesthesia care unit; SpO<sub>2</sub> = arterial oxygen saturation measured by pulse oximetry.

the groups in the number of patients with either signs or symptoms of residual paresis with the exception of double vision (13 control group *vs.* 2 neostigmine group, *P* = 0.001). The most commonly failed test of muscle strength was the 5-s head lift (14.0% control group and 6.5% neostigmine group). The most common symptoms of muscle weakness in the control and neostigmine groups were generalized weakness (48.8% *vs.* 26.7%), blurry vision (44.2% *vs.* 28.9%), and double vision (30.2% *vs.* 4.4%).

## Discussion

In 1995, Caldwell<sup>17</sup> raised the question, “If a clinician administers a single dose of an NMBA to facilitate endotracheal intubation and gives none thereafter, should an anticholinesterase be administered, even if several hours have passed?” In that circumstance, the benefits of neostigmine reversal (reduced incidence of postoperative residual

neuromuscular blockade) must be balanced against potential risks (cholinergic side effects and neostigmine-induced muscle weakness). In the present investigation, patients were given a small dose of rocuronium (approximately the ED<sub>95</sub>) at induction of anesthesia and no additional NMBA for intraoperative relaxation. Despite an average duration of anesthesia of 163 min, 21% of patients had not spontaneously recovered to a TOF ratio of 0.9 or greater at the end of the procedure. In the remaining subjects with objective evidence of acceptable neuromuscular recovery, administration of 40 µg/kg neostigmine resulted in a small increase in TOF values in all patients, with no difference in TOF values between placebo and neostigmine groups at any time, including the time of PACU admission. In addition, patients randomly assigned to receive neostigmine at TOF ratios of 0.9 or greater did not have a higher incidence of hypoxemic events or airway obstruction during transport to the PACU

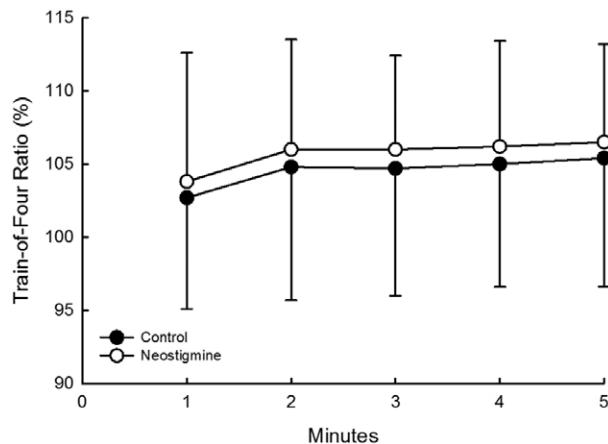

**Fig. 2.** Train-of-four ratios 1 to 5 min after administration of neostigmine or saline (control group).

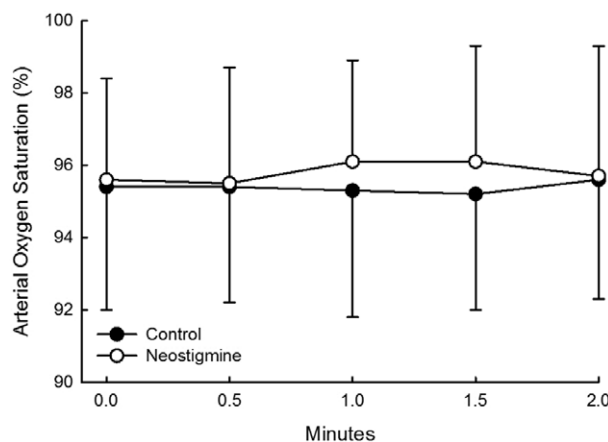

**Fig. 3.** Peripheral arterial oxygen saturation (SpO<sub>2</sub>) values measured during the time from tracheal extubation to admission to the postanesthesia care unit.

or PACU admission when compared with those administered saline. A careful assessment of muscle strength also revealed that patients administered neostigmine after spontaneous recovery from NMBA had occurred did not have more signs or symptoms of muscular weakness in the PACU.

There are several reasons clinicians may elect not to administer a reversal agent at the end of surgery. Most anesthesiologists believe antagonism of neuromuscular blockade is not required if there is absence of fade using a peripheral nerve stimulator or no evidence of muscle weakness on clinical examination<sup>3,30,31</sup>; however, both assessment methods are insensitive in detecting clinically significant levels of residual neuromuscular blockade (TOF ratios between 0.4 and 0.9).<sup>13</sup> The most frequently cited rationale for omitting reversal agents is the time interval since the last dose of NMBA.<sup>3,30,31</sup> Antagonism was considered unnecessary by anesthesiologists when more than 60 min had elapsed since a single dose of an intermediate-acting NMBA was given.<sup>31–33</sup> Clinical trials do not support this belief. Two or more hours after a two times ED<sub>95</sub> dose of vecuronium, rocuronium, or

atracurium, approximately 40% of patients had TOF ratios less than 0.9.<sup>4</sup> The only method available to reliably detect the presence or absence of incomplete neuromuscular recovery is quantitative neuromuscular monitoring; omission of neostigmine can be considered if TOF ratios of 0.9 or greater are observed. However, these monitors are infrequently used by anesthesiologists in the perioperative period.<sup>3</sup> The present study was specifically designed to minimize the risk of residual neuromuscular blockade at the conclusion of surgery. Patients undergoing procedures with an expected duration of at least 90 min and not requiring maintenance of neuromuscular blockade were enrolled. Furthermore, a small dose of rocuronium (approximately the ED<sub>95</sub>) was used to facilitate tracheal intubation. Despite application of neuromuscular management strategies that have been documented to decrease the risk of incomplete neuromuscular recovery and a relatively long duration of anesthesia (160 min), residual paresis was still present in 24 (21%) of the 114 patients at the end of surgery.

Another important reason that clinicians may decide to omit anticholinesterases is related to concerns that neostigmine can induce neuromuscular transmission failure. In 1980, Payne *et al.*<sup>14</sup> reported that, whereas a 2.5-mg dose neostigmine antagonized neuromuscular blockade, a second 2.5-mg dose of the drug depressed the peak tetanic contraction and reestablished tetanic fade. Similar findings were reported by Goldhill *et al.*<sup>15</sup> and Astley *et al.*,<sup>24</sup> although the effects persisted for only about 10 to 20 min. Caldwell<sup>17</sup> observed decreases in the TOF ratio in 8 of 40 patients given neostigmine (40 µg/kg) 2 to 4 h after a single intubating dose of vecuronium; in all 8 patients, the TOF ratio had recovered to 0.9 or greater at the time of reversal. In contrast to these findings, we observed that TOF ratios did not decrease in any patient after 40 µg/kg neostigmine, even in those with objective evidence of full neuromuscular recovery (normalized TOF of 1.0). Furthermore, small increases in the TOF ratio were observed in subjects with TOF values between 0.9 and 1.0 after anticholinesterase administration. Previous investigators have reported that moderate doses of neostigmine (2.5 mg) increased TOF values when given at a TOF ratio of 0.9, with the peak effect occurring at 5 min.<sup>15</sup> The reasons that our findings differed from those of Caldwell,<sup>17</sup> despite having a similar study design, are uncertain but may be related to differences in the type of NMBA used (vecuronium *vs.* rocuronium), monitoring technology (mechanomyography *vs.* acceleromyography), or timing of neostigmine administration (during the procedure under isoflurane anesthesia *vs.* the end of surgery in the absence of inhalational agents). In contrast to the conclusions of other small, unblinded investigations,<sup>14,17,24</sup> the results of the present clinical trial demonstrate that moderate doses of neostigmine do not produce any objective evidence of muscle weakness, as measured by fade in the TOF ratio.

Data from Massachusetts General Hospital (Boston, Massachusetts) have suggested that neostigmine can induce



**Table 3.** Muscle Strength Assessment at 15 min after Postanesthesia Care Unit Admission

|                           | Control Group | Neostigmine Group | Difference (99% CI)    | P Value |
|---------------------------|---------------|-------------------|------------------------|---------|
| Head lift, 5-s            |               |                   |                        |         |
| Sign                      | 6 (14.0%)     | 3 (6.5%)*         | 7.4% (−10.8 to 27.1%)  | 0.305   |
| Symptom                   | 9 (20.9%)     | 4 (8.7%)*         | 12.2% (−8.0 to 33.3%)  | 0.102   |
| Hand grip, 5-s            |               |                   |                        |         |
| Sign                      | 2 (4.7%)      | 0 (0%)*           | 4.7% (−8.4 to 20.6%)   | 0.231   |
| Symptom                   | 2 (4.7%)      | 2 (4.4%)*         | 0.3% (−15.5 to 16.9%)  | 0.945   |
| Eye opening, 5-s          |               |                   |                        |         |
| Sign                      | 4 (9.3%)      | 1 (2.2%)          | 7.1% (−8.5 to 25.0%)   | 0.198   |
| Symptom                   | 5 (11.6%)     | 3 (6.7%)          | 5.0% (−13.2 to 24.2%)  | 0.479   |
| Protrude tongue, 5-s      |               |                   |                        |         |
| Sign                      | 2 (4.7%)      | 1 (2.2%)          | 2.4% (−12.5 to 18.7%)  | 0.612   |
| Symptom                   | 2 (4.7%)      | 3 (6.7%)          | −2.0% (−19.0 to 15.0%) | 0.999   |
| Ability to smile          |               |                   |                        |         |
| Sign                      | 3 (7.0%)      | 3 (6.7%)          | 0.3% (−17.1 to 18.2%)  | 0.999   |
| Symptom                   | 4 (9.3%)      | 4 (8.9%)          | 0.4% (−18.1 to 19.4%)  | 0.999   |
| Ability to swallow        |               |                   |                        |         |
| Sign                      | 2 (4.7%)      | 1 (2.2%)          | 2.4% (−12.5 to 18.7%)  | 0.612   |
| Symptom                   | 2 (4.7%)      | 2 (4.4%)          | 0.2% (−15.9 to 16.8%)  | 0.999   |
| Ability to speak          |               |                   |                        |         |
| Sign                      | 2 (4.7%)      | 1 (2.2%)          | 2.4% (−12.5 to 18.7%)  | 0.612   |
| Symptom                   | 2 (4.7%)      | 3 (6.7%)          | −2.0% (−19.0 to 15.0%) | 0.999   |
| Ability to cough          |               |                   |                        |         |
| Sign                      | 3 (7.0%)      | 1 (2.2%)          | 4.8% (−10.5 to 21.9%)  | 0.355   |
| Symptom                   | 3 (7.0%)      | 1 (2.2%)          | 4.8% (−10.5 to 21.9%)  | 0.355   |
| Track object with eyes    |               |                   |                        |         |
| Sign                      | 3 (7.0%)      | 2 (4.4%)          | 2.5% (−13.9 to 20.1%)  | 0.673   |
| Symptom                   | 3 (7.0%)      | 2 (4.4%)          | 2.5% (−13.9 to 20.1%)  | 0.673   |
| Ability to breathe deeply |               |                   |                        |         |
| Sign                      | 1 (2.3%)      | 1 (2.2%)          | 0.1% (−14.6 to 15.3%)  | 0.999   |
| Symptom                   | 2 (4.7%)      | 2 (4.4%)          | 0.2% (−15.9 to 16.8%)  | 0.999   |
| Tongue depressor test     |               |                   |                        |         |
| Sign                      | 2 (4.7%)      | 1 (2.2%)          | 2.4% (−12.5 to 18.7%)  | 0.612   |
| Symptom                   | 2 (4.7%)      | 3 (6.7%)          | −2.0% (−19.0 to 15.0%) | 0.999   |
| Blurry vision             | 19 (44.2%)    | 13 (28.9%)        | 15.3% (−11.2 to 40.0%) | 0.136   |
| Double vision             | 13 (30.2%)    | 2 (4.4%)          | 25.8% (5.8 to 46.5%)   | 0.001   |
| Facial weakness           | 3 (7.0%)      | 3 (6.7%)          | 0.3% (−17.1 to 18.2%)  | 0.999   |
| Facial numbness           | 4 (9.3%)      | 4 (8.9%)          | 0.4% (−18.1 to 19.4%)  | 0.999   |
| General weakness          | 21 (48.8%)    | 12 (26.7%)        | 22.2% (−4.6 to 46.2%)  | 0.032   |
| Overall weakness          | 0 (0–2)       | 0 (0–1)           | 0 (0–1)                | 0.037   |

Data are median (range) or number of patients (%). Overall weakness was evaluated on an 11-point verbal rating scale (0 = no muscle weakness, 10 = most severe muscle weakness experienced). Tongue depressor test included the ability to resist the removal of a tongue depressor held between the incisors teeth. Data as median (interquartile range) were compared using the Mann–Whitney U test, and data reported as number of patients (%) were compared using the Pearson chi-square test or, when at least one of the cells of the contingency table had an expected  $n < 5$ , Fisher exact probability test. Only double vision met the criterion for rejection of the null hypothesis ( $P < 0.01$ ).  $N = 43$  in the control group and 45 in the neostigmine group, except where indicated.

\* $N = 46$ .

muscle weakness and adversely affect respiratory outcomes. In animal models and human volunteers, neostigmine treatment after full recovery from neuromuscular blockade can impair upper airway dilator volume or critical closing pressure, genioglossus muscle function, diaphragmatic function, and breathing.<sup>19–21</sup> In addition, large observational and database studies from the same institution have described an association between neostigmine administration or unwarranted neostigmine use and an increased incidence of atelectasis, pulmonary edema, desaturations, postoperative pulmonary complication, and longer PACU and hospital stays.<sup>22,23</sup> The

investigators hypothesized that “It is not safe to administer neostigmine to a patient who has spontaneously recovered from neuromuscular blockade because neostigmine dose-dependently affects respiratory muscle function and increases upper airway collapsibility.”<sup>22</sup> In contrast to these findings, other investigators have reported no clinical evidence of respiratory muscle weakness in postoperative patients given neostigmine at near or full neuromuscular recovery.<sup>15,25,26,28</sup> Furthermore, a secondary analysis of the database findings from the Massachusetts General Hospital revealed that appropriate administration of neostigmine (monitoring and



dosing) resulted in a decreased risk of postoperative hypoxic events and pulmonary complications.<sup>16,23</sup>

In the present investigation, reversal of neuromuscular blockade with neostigmine at TOF ratios of 0.9 or greater did not adversely affect upper airway function in postoperative surgical patients. Research assistants and PACU nurses carefully monitored patients for evidence of impairment of upper airway musculature during a high-risk period for postoperative respiratory events. Episodes of airway obstruction during transport from the operating room to the PACU and during PACU admission were infrequent and did not differ between study groups. Our findings are consistent with previous studies that have noted that postextubation airway obstruction is uncommon after neostigmine antagonism at recovery at a TOF ratio of 0.9 or greater.<sup>34–36</sup> In addition, neostigmine reversal was not associated with an increased risk of postoperative hypoxic events. No differences between the neostigmine and control groups were noted in  $SpO_2$  values during transport to the PACU. During PACU admission, fewer patients (approximately one half) in the neostigmine group had episodes of moderate or severe hypoxemia, required stimulation to maintain oxygenation, or needed additional oxygen therapy compared with the control group; however, these differences were not statistically significant, possibly because the study was not powered to examine these secondary outcomes.

Symptoms of muscle weakness (difficulty swallowing and diplopia) have been described in awake volunteers administered neostigmine (30 µg/kg) after spontaneous neuromuscular recovery to a TOF ratio of 1.0.<sup>21</sup> To further assess patients for possible neostigmine-induced muscle weakness, all of the subjects in our investigation were examined for 16 symptoms and 11 signs of impaired muscle function in the PACU. As noted previously,<sup>37</sup> more than 90% of patients admitted to the PACU with TOF ratios of 0.9 or greater were able to perform tests (signs) of muscle strength (with the exception of 5-s head lift, failed by 14.0% of control group and 6.5% of the neostigmine group), with no differences observed between study groups. The most common symptoms of muscle weakness described by patients in the PACU were blurry vision, double vision, and general weakness, with fewer symptoms noted in the neostigmine groups (4 to 29%) than in the control group (30 to 49%;  $P = 0.001$  for double vision). These findings are not unexpected. Studies in both awake volunteers and postoperative surgical patients have reported that the most frequently described symptoms of residual paresis after recovery to a TOF ratio of 0.9 or greater are visual problems (34 to 70% of subjects) and general weakness or fatigue (44 to 45% of subjects).<sup>37–39</sup> Our findings suggest that use of reversal agents may decrease the risk of patients experiencing unpleasant symptoms of muscle weakness after surgery.

There are several limitations to this clinical trial. Although the incidence of observable upper airway events

was not increased in patients administered an anticholinesterase, neostigmine might produce more subtle effects on the respiratory system that were not detectable on clinical examination (*e.g.*, upper airway critical closing pressure).<sup>21</sup> Second, only one dose of neostigmine (40 µg/kg) was examined in the investigation; it is possible that larger doses could induce muscle weakness. Surveys have indicated that the most common dose of neostigmine administered by anesthesiologists in the United States is 50 µg/kg, with many respondents indicating that they used even larger doses.<sup>3</sup> Third, study solutions were administered when the TOF-Watch SX displayed a TOF ratio of 0.9 (to represent standard clinical practices). When normalized for higher baseline TOF measures, a TOF of 0.9 on the TOF-Watch SX may represent a lower actual TOF ratio. However, only 7 of the 90 patients in the study group had not achieved a normalized TOF of 0.9 at the time of reversal. Finally, neuromuscular monitoring was conducted for at least 5 min after neostigmine administration; some investigators have determined that the peak effect of neostigmine occurs 6 to 10 min after it is given.<sup>40</sup>

In conclusion, administration 40 µg/kg neostigmine to patients with objective evidence of neuromuscular recovery (TOF ratios 0.9 to 1.0) did not adversely affect TOF values, respiratory function, or signs and symptoms of muscle strength. Furthermore, a high incidence of incomplete neuromuscular recovery (21%) was observed despite the use of a small dose of rocuronium and a relatively long duration of anesthesia (163 min). Clinicians should not avoid the use of neostigmine due to concerns related to anticholinesterase-induced muscle weakness. In light of the high risk of residual neuromuscular blockade in postoperative surgical patients, neostigmine should be routinely administered unless full neuromuscular recovery has been documented with quantitative neuromuscular monitoring.

## Research Support

Support was provided solely from institutional and/or departmental sources.

## Competing Interests

The authors declare no competing interests.

## Reproducible Science

Full protocol available at: dgmurphy2@yahoo.com. Raw data available at: dgmurphy2@yahoo.com.

## Correspondence

Address correspondence to Dr. Murphy: Department of Anesthesiology, NorthShore University HealthSystem, 2650 Ridge Ave., Evanston, Illinois 60201. dgmurphy2@yahoo.com. This article may be accessed for personal use at no charge through the Journal Web site, [www.anesthesiology.org](http://www.anesthesiology.org).

## References

- Lien CA: Neostigmine: How much is necessary for patients who receive a nondepolarizing neuromuscular blocking agent? *ANESTHESIOLOGY* 2010; 112:16–8
- Fuchs-Buder T, Meistelman C: Monitoring of neuromuscular block and prevention of residual paralysis [in French]. *Ann Fr Anesth Reanim* 2009; 28(suppl 2):S46–50
- Naguib M, Kopman AF, Lien CA, Hunter JM, Lopez A, Brull SJ: A survey of current management of neuromuscular block in the United States and Europe. *Anesth Analg* 2010; 111:110–9
- Debaene B, Plaud B, Dilly MP, Donati F: Residual paralysis in the PACU after a single intubating dose of nondepolarizing muscle relaxant with an intermediate duration of action. *ANESTHESIOLOGY* 2003; 98:1042–8
- Kopman AF, Eikermann M: Antagonism of non-depolarising neuromuscular block: current practice. *Anaesthesia* 2009; 64(suppl 1):22–30
- Baillard C, Gehan G, Reboul-Marty J, Larmignat P, Samama CM, Cupa M: Residual curarization in the recovery room after vecuronium. *Br J Anaesth* 2000; 84:394–5
- Maybauer DM, Geldner G, Blobner M, Pühringer F, Hofmockel R, Rex C, Wulf HF, Eberhart L, Arndt C, Eikermann M: Incidence and duration of residual paralysis at the end of surgery after multiple administrations of cisatracurium and rocuronium. *Anaesthesia* 2007; 62:12–7
- Pietraszewski P, Gaszyński T: Residual neuromuscular block in elderly patients after surgical procedures under general anaesthesia with rocuronium. *Anaesthesiol Intensive Ther* 2013; 45:77–81
- Arbous MS, Meursing AE, van Kleef JW, de Lange JJ, Spoormans HH, Touw P, Werner FM, Grobbee DE: Impact of anesthesia management characteristics on severe morbidity and mortality. *ANESTHESIOLOGY* 2005; 102:257–68
- Bulka CM, Terekhov MA, Martin BJ, Dmochowski RR, Hayes RM, Ehrenfeld JM: Nondepolarizing neuromuscular blocking agents, reversal, and risk of postoperative pneumonia. *ANESTHESIOLOGY* 2016; 125:647–55
- Miller RD, Ward TA: Monitoring and pharmacologic reversal of a nondepolarizing neuromuscular blockade should be routine. *Anesth Analg* 2010; 111:3–5
- Viby-Mogensen J: Postoperative residual curarization and evidence-based anaesthesia. *Br J Anaesth* 2000; 84:301–3
- Brull SJ, Murphy GS: Residual neuromuscular block: Lessons unlearned—Part II: Methods to reduce the risk of residual weakness. *Anesth Analg* 2010; 111:129–40
- Payne JP, Hughes R, Al Azawi S: Neuromuscular blockade by neostigmine in anaesthetized man. *Br J Anaesth* 1980; 52:69–76
- Goldhill DR, Wainwright AP, Stuart CS, Flynn PJ: Neostigmine after spontaneous recovery from neuromuscular blockade: Effect on depth of blockade monitored with train-of-four and tetanic stimuli. *Anaesthesia* 1989; 44:293–9
- Grosse-Sundrup M, Henneman JP, Sandberg WS, Bateman BT, Uribe JV, Nguyen NT, Ehrenfeld JM, Martinez EA, Kurth T, Eikermann M: Intermediate acting non-depolarizing neuromuscular blocking agents and risk of postoperative respiratory complications: Prospective propensity score matched cohort study. *BMJ* 2012; 345:e6329
- Caldwell JE: Reversal of residual neuromuscular block with neostigmine at one to four hours after a single intubating dose of vecuronium. *Anesth Analg* 1995; 80:1168–74
- de Paula Ramos E, Antônio MB, Ambiel CR, Correia-de-Sá P, Alves-Do-Prado W: Paradoxical neostigmine-induced TOFFade: On the role of presynaptic cholinergic and adenosine receptors. *Eur J Pharmacol* 2014; 723:389–96
- Eikermann M, Fassbender P, Malhotra A, Takahashi M, Kubo S, Jordan AS, Gautam S, White DP, Chamberlin NL: Unwarranted administration of acetylcholinesterase inhibitors can impair genioglossus and diaphragm muscle function. *ANESTHESIOLOGY* 2007; 107:621–9
- Eikermann M, Zaremba S, Malhotra A, Jordan AS, Rosow C, Chamberlin NL: Neostigmine but not sugammadex impairs upper airway dilator muscle activity and breathing. *Br J Anaesth* 2008; 101:344–9
- Herbstreit F, Zigran D, Ochterbeck C, Peters J, Eikermann M: Neostigmine/glycopyrrolate administered after recovery from neuromuscular block increases upper airway collapsibility by decreasing genioglossus muscle activity in response to negative pharyngeal pressure. *ANESTHESIOLOGY* 2010; 113:1280–8
- Sasaki N, Meyer MJ, Malviya SA, Stanislaus AB, MacDonald T, Doran ME, Igumensheva A, Hoang AH, Eikermann M: Effects of neostigmine reversal of nondepolarizing neuromuscular blocking agents on postoperative respiratory outcomes: A prospective study. *ANESTHESIOLOGY* 2014; 121:959–68
- McLean DJ, Diaz-Gil D, Farhan HN, Ladha KS, Kurth T, Eikermann M: Dose-dependent association between intermediate-acting neuromuscular-blocking agents and postoperative respiratory complications. *ANESTHESIOLOGY* 2015; 122:1201–13
- Astley BA, Katz RL, Payne JP: Electrical and mechanical responses after neuromuscular blockade with vecuronium, and subsequent antagonism with neostigmine or edrophonium. *Br J Anaesth* 1987; 59:983–8
- Choi ES, Oh AY, Seo KS, Hwang JW, Ryu JH, Koo BW, Kim BG: Optimum dose of neostigmine to reverse shallow neuromuscular blockade with rocuronium and cisatracurium. *Anaesthesia* 2016; 71:443–9
- Song IA, Seo KS, Oh AY, No HJ, Hwang JW, Jeon YT, Park SH, Do SH: Timing of reversal with respect to three nerve stimulator end-points from cisatracurium-induced neuromuscular block. *Anaesthesia* 2015; 70:797–802
- Fuchs-Buder T, Meistelman C, Alla F, Grandjean A, Wuthrich Y, Donati F: Antagonism of low degrees of atracurium-induced neuromuscular blockade: Dose-effect relationship for neostigmine. *ANESTHESIOLOGY* 2010; 112:34–40
- Fox MA, Keens SJ, Utting JE: Neostigmine in the antagonism of the action of atracurium. *Br J Anaesth* 1987; 59:468–72
- Fuchs-Buder T, Claudius C, Skovgaard LT, Eriksson LI, Mirakhor RK, Viby-Mogensen J: 8<sup>th</sup> International Neuromuscular Meeting: Good clinical research practice in pharmacodynamic studies of neuromuscular blocking agents II: The Stockholm revision. *Acta Anaesthesiol Scand* 2007; 51:789–808
- Fuchs-Buder T, Hofmockel R, Geldner G, Diefenbach C, Ulm K, Blobner M: The use of neuromuscular monitoring in Germany [in German]. *Anaesthesist* 2003; 52:522–6
- Duvaldestin P, Cunin P, Plaud B, Maison P: French survey of neuromuscular relaxant use in anaesthetic practice in adults [in French]. *Ann Fr Anesth Reanim* 2008; 27:483–9
- Vieira RL, Vieira JE: What rules of thumb do clinicians use to decide whether to antagonize nondepolarizing neuromuscular blocking drugs? *Anesth Analg* 2011; 113:1192–6
- Grayling M, Sweeney BP: Recovery from neuromuscular blockade: A survey of practice. *Anaesthesia* 2007; 62:806–9
- Norton M, Xará D, Parente D, Barbosa M, Abelha FJ: Residual neuromuscular block as a risk factor for critical respiratory events in the post anesthesia care unit. *Rev Esp Anestesiol Reanim* 2013; 60:190–6
- Murphy GS, Szokol JW, Marymont JH, Greenberg SB, Avram MJ, Vender JS, Nisman M: Intraoperative acceleromyographic monitoring reduces the risk of residual neuromuscular blockade and adverse respiratory events in the postanesthesia care unit. *ANESTHESIOLOGY* 2008; 109:389–98
- Murphy GS, Szokol JW, Marymont JH, Greenberg SB, Avram MJ, Vender JS: Residual neuromuscular blockade and critical respiratory events in the postanesthesia care unit. *Anesth Analg* 2008; 107:130–7

37. Murphy GS, Szokol JW, Avram MJ, Greenberg SB, Shear T, Vender JS, Gray J, Landry E: Postoperative residual neuromuscular blockade is associated with impaired clinical recovery. *Anesth Analg* 2013; 117:133–41
38. Kopman AF, Yee PS, Neuman GG: Relationship of the train-of-four fade ratio to clinical signs and symptoms of residual paralysis in awake volunteers. *ANESTHESIOLOGY* 1997; 86:765–71
39. Murphy GS, Szokol JW, Avram MJ, Greenberg SB, Shear TD, Vender JS, Parikh KN, Patel SS, Patel A: Residual neuromuscular block in the elderly: Incidence and clinical implications. *ANESTHESIOLOGY* 2015; 123:1322–36
40. Kirkegaard-Nielsen H, Helbo-Hansen HS, Lindholm P, Severinsen IK, Bülow K: Time to peak effect of neostigmine at antagonism of atracurium- or vecuronium-induced neuromuscular block. *J Clin Anesth* 1995; 7:635–9

## ANESTHESIOLOGY REFLECTIONS FROM THE WOOD LIBRARY-MUSEUM

### America Helps Germany in “the Battle for Borocaine”

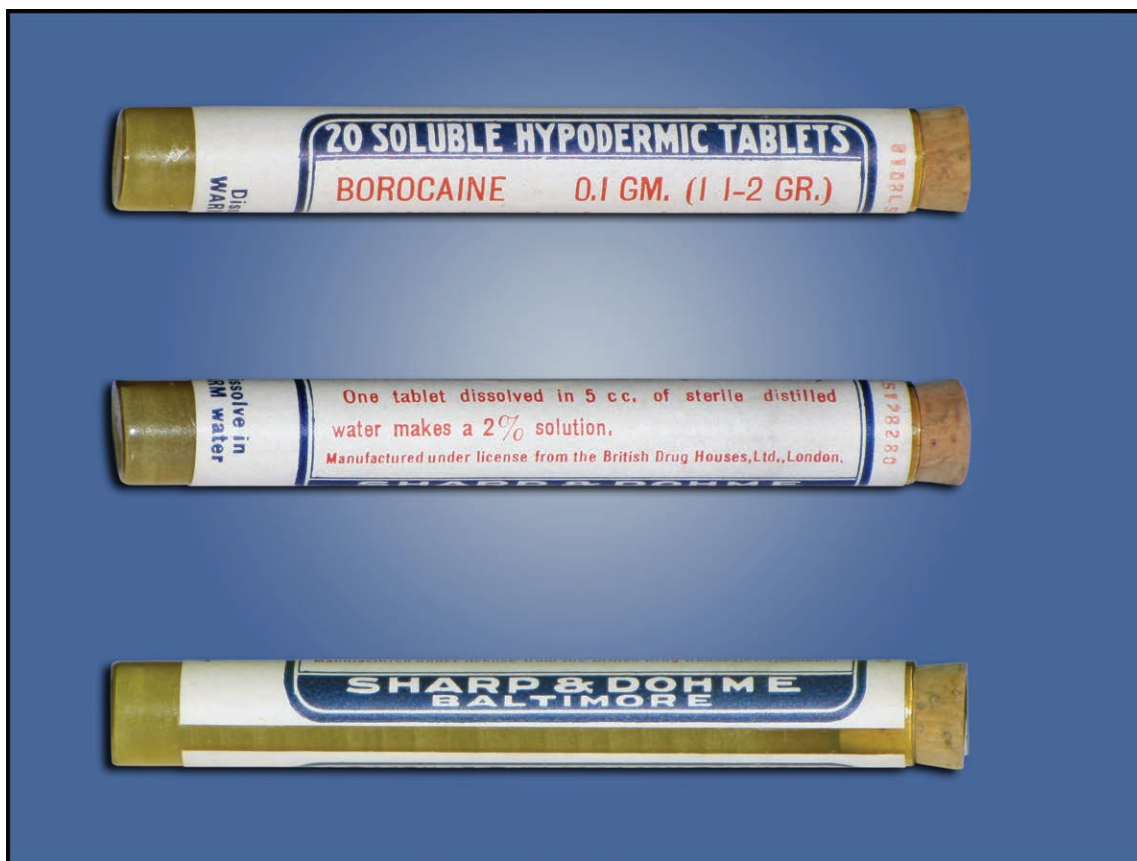

Manufactured by Sharp & Dohme of Baltimore, each corked vial (above) contained 20 soluble hypodermic tablets of Borocaine “under license from the British Drug Houses, Ltd., London.” Because each tablet contained 0.1 g of procaine borate, dissolving a tablet in 5 ml of sterile water yielded a 2% solution of this ester local anesthetic. Unfortunately for Borocaine’s British licensing firm, the American Medical Association’s Chemical Laboratory determined that the “formula  $2(C_{13}H_{20}O_2N_2), 4H_2O, 5B_2O_3$ , as given by the manufacturer...is incorrect; on the other hand, it appears that borocaine has the formula  $C_{13}H_{20}O_2N_2 \cdot 5HBO_2$ ” and is “identical to the one first prepared by Einhorn and Uhfelder some years ago” in Germany. And this is how America helped Germany in “the Battle for Borocaine.” (Copyright © the American Society of Anesthesiologists’ Wood Library-Museum of Anesthesiology.)

George S. Bause, M.D., M.P.H., *Honorary Curator and Laureate of the History of Anesthesia, Wood Library-Museum of Anesthesiology, Schaumburg, Illinois, and Clinical Associate Professor, Case Western Reserve University, Cleveland, Ohio.* UJYC@aol.com.
